# Supplementary material for: Removal and injection of keypoints for SIFT-based copy-move counter-forensics
Source: Springer Nature journal article supplement (doi:10.1186/1687-417x-2013-8), 2013-12-01

Gaussian Smoothing

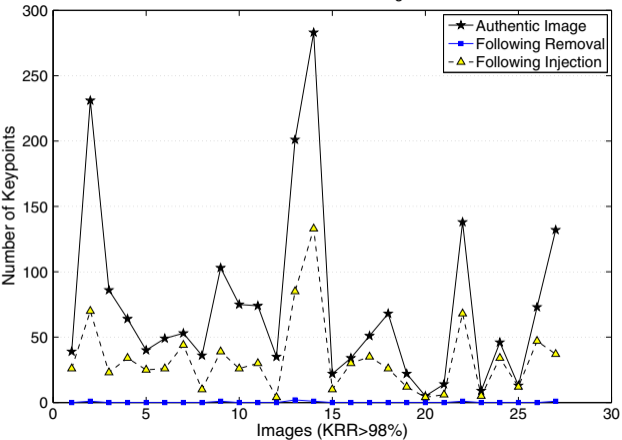

CLAHE

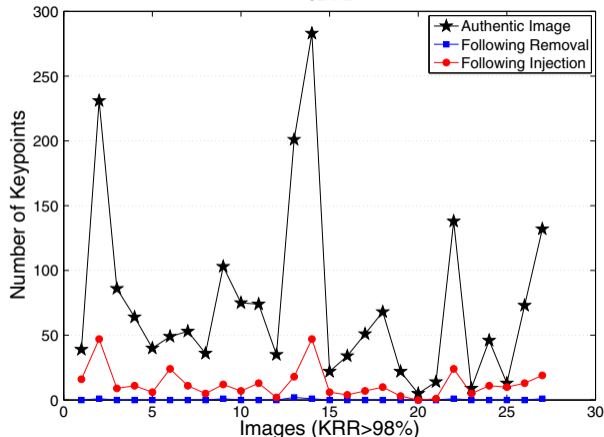

Supplement: 13635_2013_15_MOESM4_ESM.pdf [file 13635_2013_15_MOESM4_ESM.pdf]
